# Supplementary material for: Cardiolipin Supports Respiratory Enzymes in Plants in Different Ways
Source: PubMed Central journal article supplement (PMC5296312; doi:10.3389/fpls.2017.00072), 2017-02-08
Supplement: Table_2.pdf [file Table_2.pdf]

**Supplemental Table 2:** integrated spot volumes of II<sub>1</sub> subunits

| spot                  | integrated gray volumes w/o background - <i>c/s</i> |        |        | integrated gray volumes w/o background - WT |        |        |
|-----------------------|-----------------------------------------------------|--------|--------|---------------------------------------------|--------|--------|
|                       | 1                                                   | 2      | 3      | 1                                           | 2      | 3      |
| 56                    | 389,7                                               | 874,3  | 727,7  | 783,1                                       | 305,7  | 601,2  |
| 58                    | 364,6                                               | 1142,0 | 859,0  | 607,6                                       | 336,0  | 620,2  |
| 83                    | 1045,1                                              | 1076,6 | 1351,8 | 1261,7                                      | 534,6  | 1259,5 |
| 95                    | 781,9                                               | 1079,6 | 1270,5 | 1073,8                                      | 548,2  | 1077,5 |
| 106                   | 577,3                                               | 612,9  | 757,0  | nd                                          | 292,6  | 579,3  |
| 119                   | 270,3                                               | 373,4  | 212,4  | 424,7                                       | 65,0   | 330,5  |
| 123                   | 497,2                                               | 606,0  | 964,1  | 720,7                                       | 321,5  | 559,1  |
| sum (w/o spot<br>106) | 3348,8                                              | 5151,9 | 5385,4 | 4871,6                                      | 2111,0 | 4447,9 |
